# Supplementary material
Source: MDPI journal article supplement (https://www.mdpi.com/2571-6980/4/4/20)
Supplement: s1 [file s1]

Archive with 4 entries (4 files):
- Figure S1.tiff
- Figure S2.tiff
- Figure S3.jpg
- legends S.pdf
