# Supplementary material
Source: MDPI journal article supplement (https://www.mdpi.com/2571-6980/4/4/20)

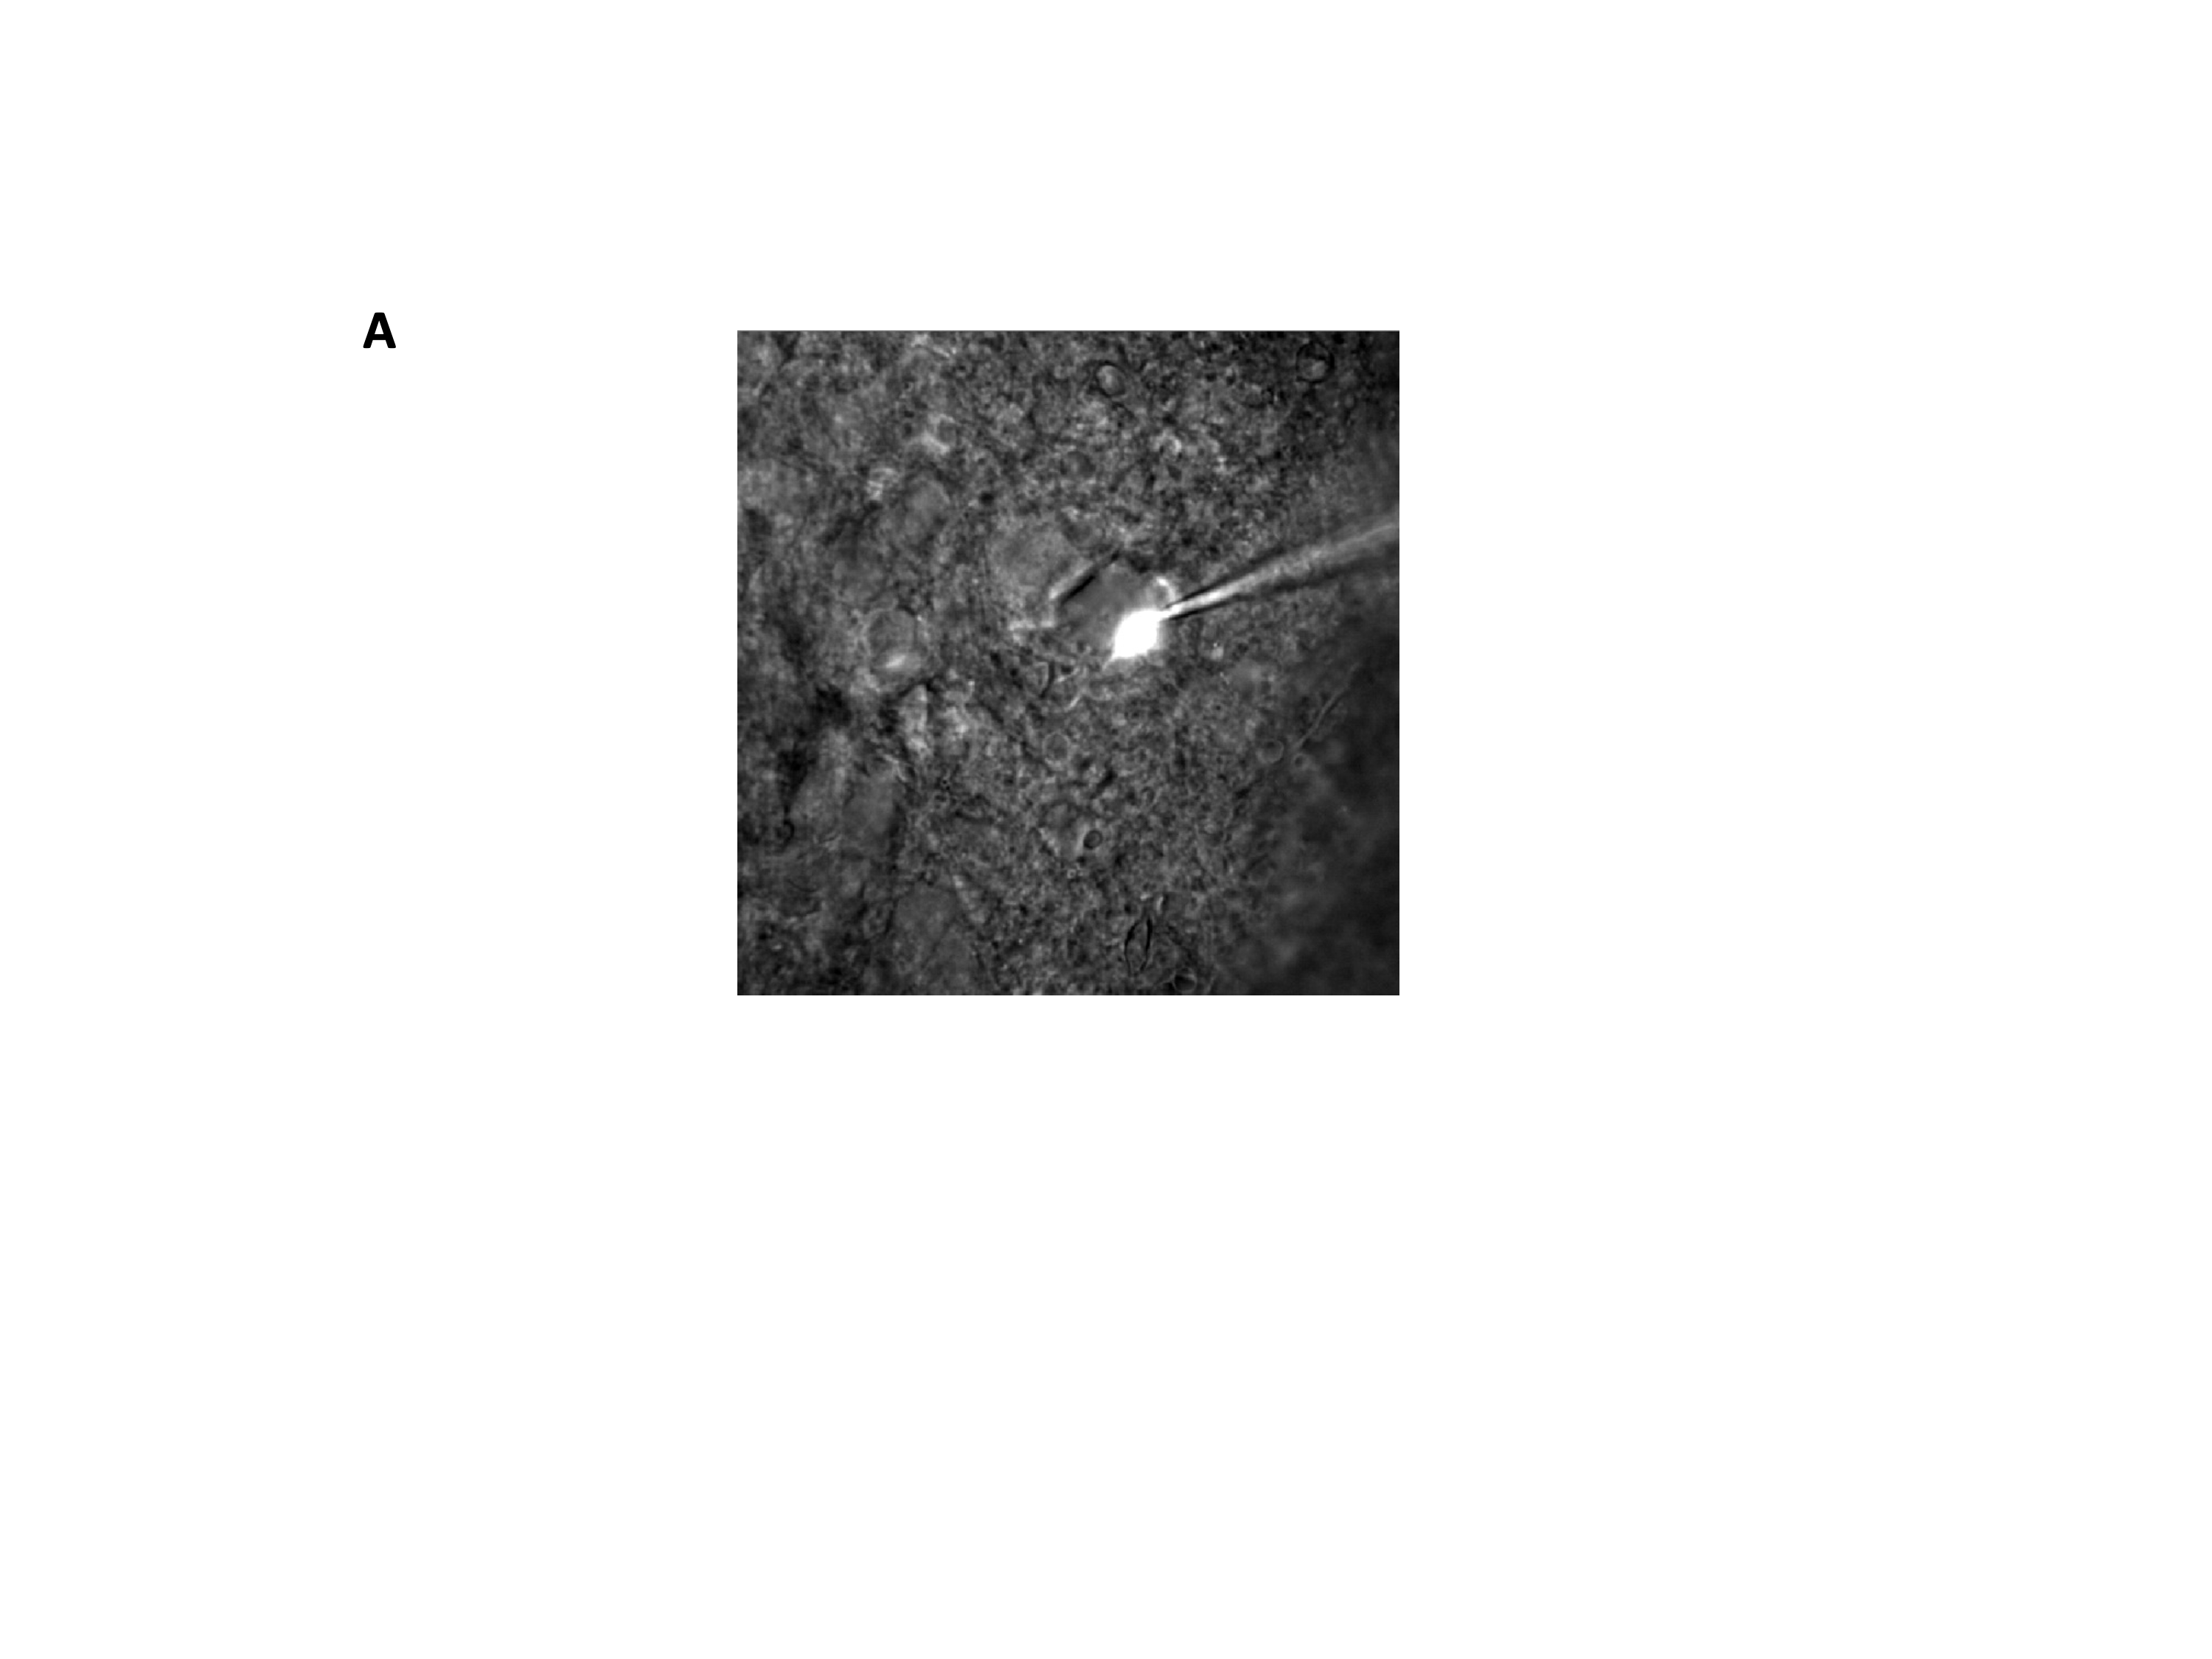

Supplement: s1 [file s1 › Figure S1.tiff]

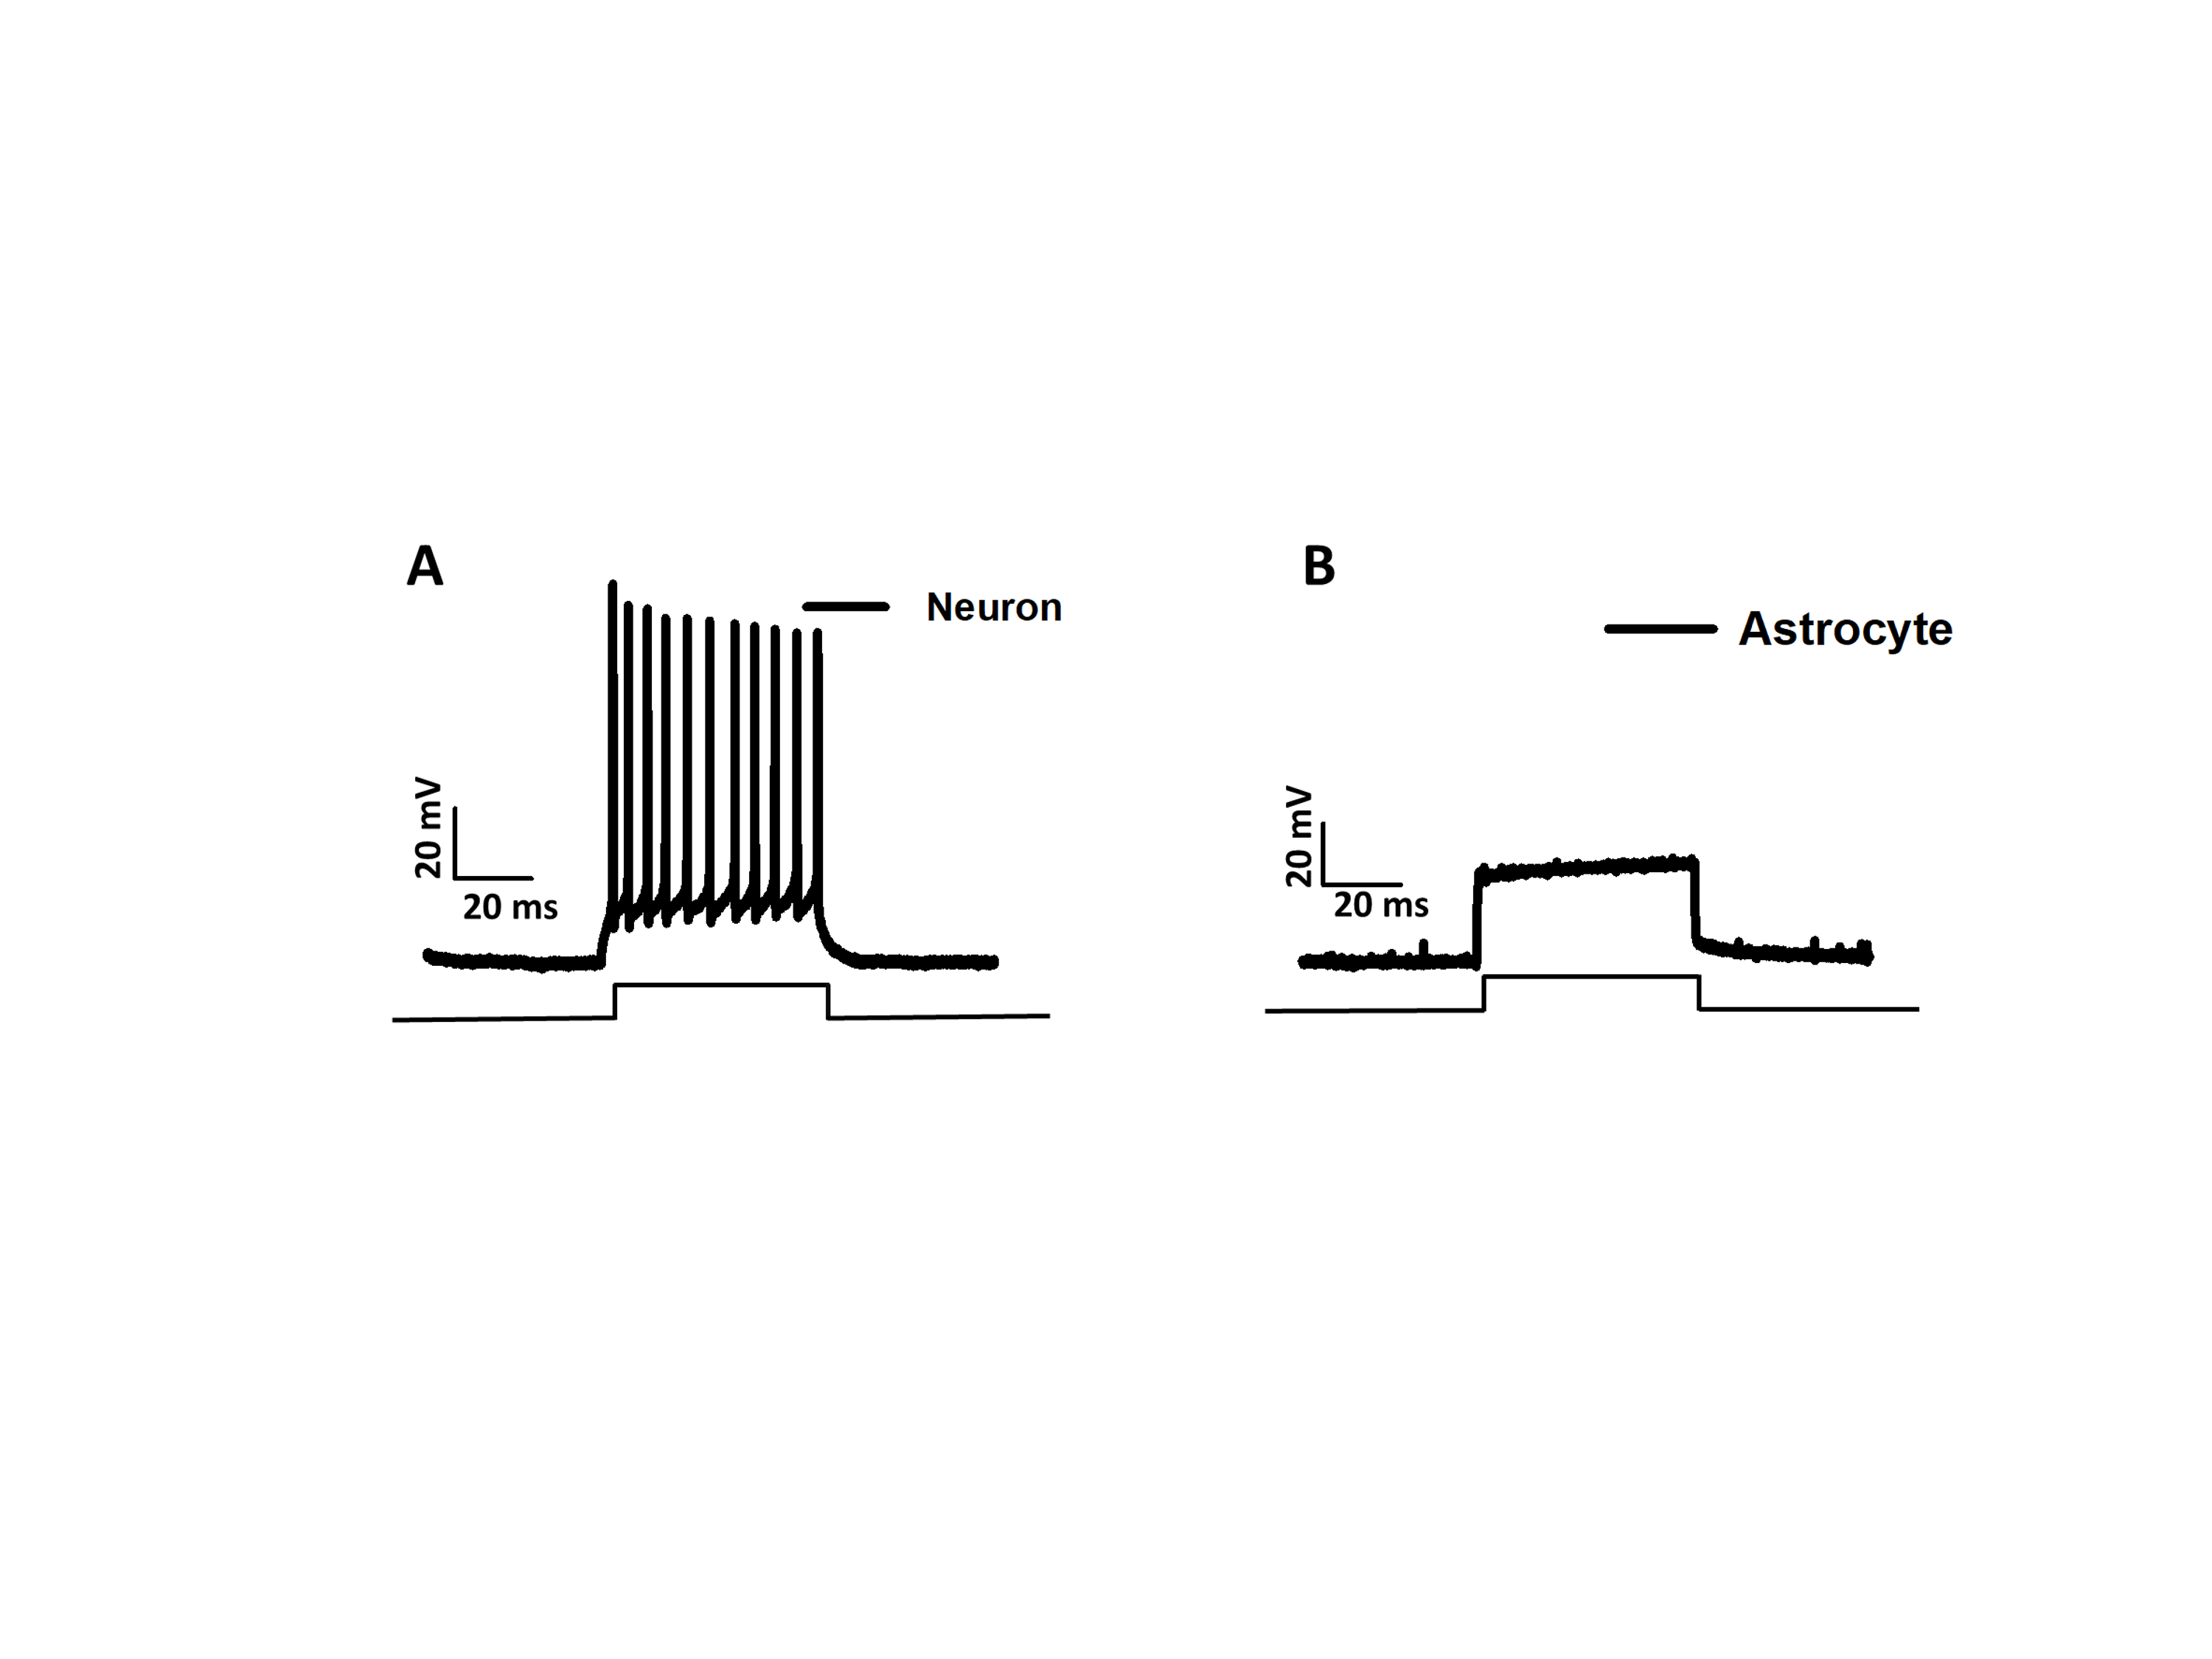

Supplement: s1 [file s1 › Figure S2.tiff]

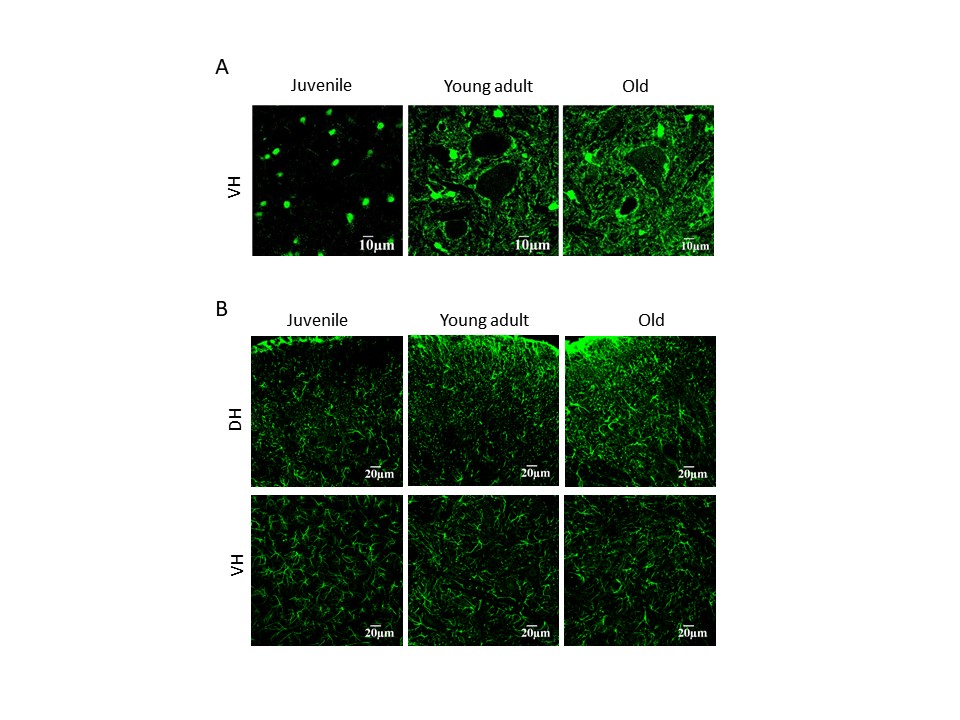

Supplement: s1 [file s1 › Figure S3.jpg]
